# Supplementary material for: Impact of urban geology on model simulations of shallow groundwater levels and flow paths
Source: Copernicus journal article supplement (doi:10.5194/hess-27-1645-2023), 2023-04-19
Supplement: Supplementary file 1 [file hess-27-1645-2023-supplement.pdf]

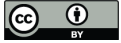

*Supplement of*

## **Impact of urban geology on model simulations of shallow groundwater levels and flow paths**

**Ane LaBianca et al.**

*Correspondence to:* Ane LaBianca (ala@geus.dk)

The copyright of individual parts of the supplement might differ from the article licence.

## Supplementary material

**Table S1. Overview of data for the geological models**

| Category                        | Data type                      | Source                                                    | The geological model that utilized the data |
|---------------------------------|--------------------------------|-----------------------------------------------------------|---------------------------------------------|
| Hydrostratigraphical model (V0) | 3D layer model in GeoScene     | Sandersen and Kallesøe (2017)                             | V0, V1, V2                                  |
| Urban infrastructure            | Sewer network                  | Vandcenter Syd A/S (2019a)                                | V1, V2                                      |
|                                 | Water supply pipes             | Vandcenter Syd A/S (2019b)                                | V1, V2                                      |
|                                 | District heating pipes         | Fjernvarme Fyn (2019)                                     | V1, V2                                      |
|                                 | Gas pipes                      | Danish Gas Distribution (2019)                            | V1, V2                                      |
|                                 | Roads and railways             | Danish Geodata Agency (2019)                              | V1, V2                                      |
|                                 | Road build-up material         | Vejdirektoratet (2019)                                    | V1, V2                                      |
|                                 | Railway build-up material      | Nielsen (2016)                                            | V1, V2                                      |
|                                 | Buildings and basements        | Odense Kommune (2019)                                     | V1, V2                                      |
| Soil material                   | Soil mail                      | Jakobsen et al. (2022)                                    | V2                                          |
|                                 | Shallow geotechnical boreholes | Geological surveys of Denmark and Greenland (GEUS) (2019) | V2                                          |

**Table S2. The hydrological model versions, their difference in geological model and computational grid size, and calibration setup.**

| Hydrological model | Geological model input | Horizontal resolution of the computational grid (m) | Calibration setup      |                        |                                             |                               |
|--------------------|------------------------|-----------------------------------------------------|------------------------|------------------------|---------------------------------------------|-------------------------------|
|                    |                        |                                                     | No. of free parameters | No. of tied parameters | Target /acceptable<br>$\Phi_m^t / \Phi_m^a$ | Achieved<br>$\Phi_m / \Phi_t$ |
| V0_50              | V0                     | 50                                                  | 8                      | 7                      | 27 / 29                                     | 27/35                         |
| V0_10              | V0                     | 10                                                  | 7                      | 23                     | 52 / 54                                     | 52/54                         |
| V1_50              | V1                     | 50                                                  | 7                      | 23                     | 52 / 55                                     | 52/54                         |
| V1_10              | V1                     | 10                                                  | 8                      | 7                      | 27 / 28                                     | 28/28                         |
| V2_50              | V2                     | 50                                                  | 7                      | 23                     | 55 / 58                                     | 55/57                         |
| V2_10              | V2                     | 10                                                  | 7                      | 23                     | 36 / 38                                     | 35/38                         |
